# Supplementary material for: Self-assembly of a unique hexadecanuclear [4 × (2 × 2)]-Pb16 ‘grid of grids’ type structure
Source: Royal Society of Chemistry journal article supplement (doi:10.1039/b308512k), 2003-01-01
Supplement: b308512k.doc [file b308512k.doc]

**Self-assembly of a unique hexadecanuclear [4 × (2 × 2)]-Pb16 'grid of grids' type structure**

Stuart T. Onions,*a* Anthony M. Frankin,*a* Peter N. Horton*b*, Michael B. Hursthouse*b* and Craig J. Matthews**,a*

*a School of Science, Division of Chemistry, Nottingham Trent University, Clifton Lane, Nottingham, UK NG11 8NS.* Fax: (+44)115-848-6636

E-mail: [craig.matthews@ntu.ac.uk](mailto:craig.matthews@ntu.ac.uk)

*b EPSRC National Crystallographic Service, Department of Chemistry, University of Southampton, Highfield, Southampton, UK SO17 1BJ.*

**Electronic Supplementary Information**

**Synthesis of L:**To a hot solution of 6-hydrazide-2,2’-bipyridine (3.0 g, 14.0 mmol) with glacial acetic acid (2 drops) in dry MeOH (100 ml) was added dropwise diethylpyrimidine-3,6-dimidate (1.35 g, 6.1 mmol) in dry MeOH (50 ml) and the solution heated under reflux for 4 h. The precipitated product was then collected via filtration while the reaction mixture was still boiling and washed thoroughly with Et2O. The pale yellow solid was then dried under vacuum for 6h at 60 0C. Yield 2.90 g, 86% m.p. >250 0C. Found: C, 59.8; H, 3.95; N, 29.9. C28H22N12O2. Calc. for C28H22N12O2 C, 60.2; H, 4.0; N, 30.1%. max (KBr)/cm-1 3432-3317 (NH, NH2), 1680 (C=O (hydrazide)), 1640, (C=C (arom.)), 1582 (C=N (arom.)), 1519, 1442, 1167, 994 (py. ring) and 756. H (270 MHz; TFA-d1) 9.6 (1 H, s, H-*2*’’), 9.3 (1 H, s, *H*-5’’), 8.8 (2 H, d, J 5.4, Ar-*H*), 8.7 (4 H, m, Ar-*H*), 8.5 (4 H, m, Ar-*H*), 8.3 (2 H, d, J 7.9, Ar-*H*) and 8.1 (2 H, t, J 5.9, Ar-*H*). C (67.8 MHz; TFA-d1) 164.3 (*C*=O), 159.8 (*C*-4’’, 6’’), 159.5 (*C*-2’’), 152.5 (C=*N*H), 148.6 (*C*-Ar), 147.3 (*C*-Ar), 146.8 (*C*-Ar), 145.4 (*C*-Ar), 142.3 (*C*-Ar), 141.6 (*C*-Ar), 128.1 (*C*-Ar), 127.5 (*C*-Ar), 126.6 (*C*-Ar), 124.6 (*C*-Ar) and 117.6 (*C*-5’’). *m/z* (ESI) 559 (M+H).
